# Supplementary material
Source: publisher figshare collection journal article supplement (https://gsapubs.figshare.com/articles/dataset/_/21919362)

Fig. S1

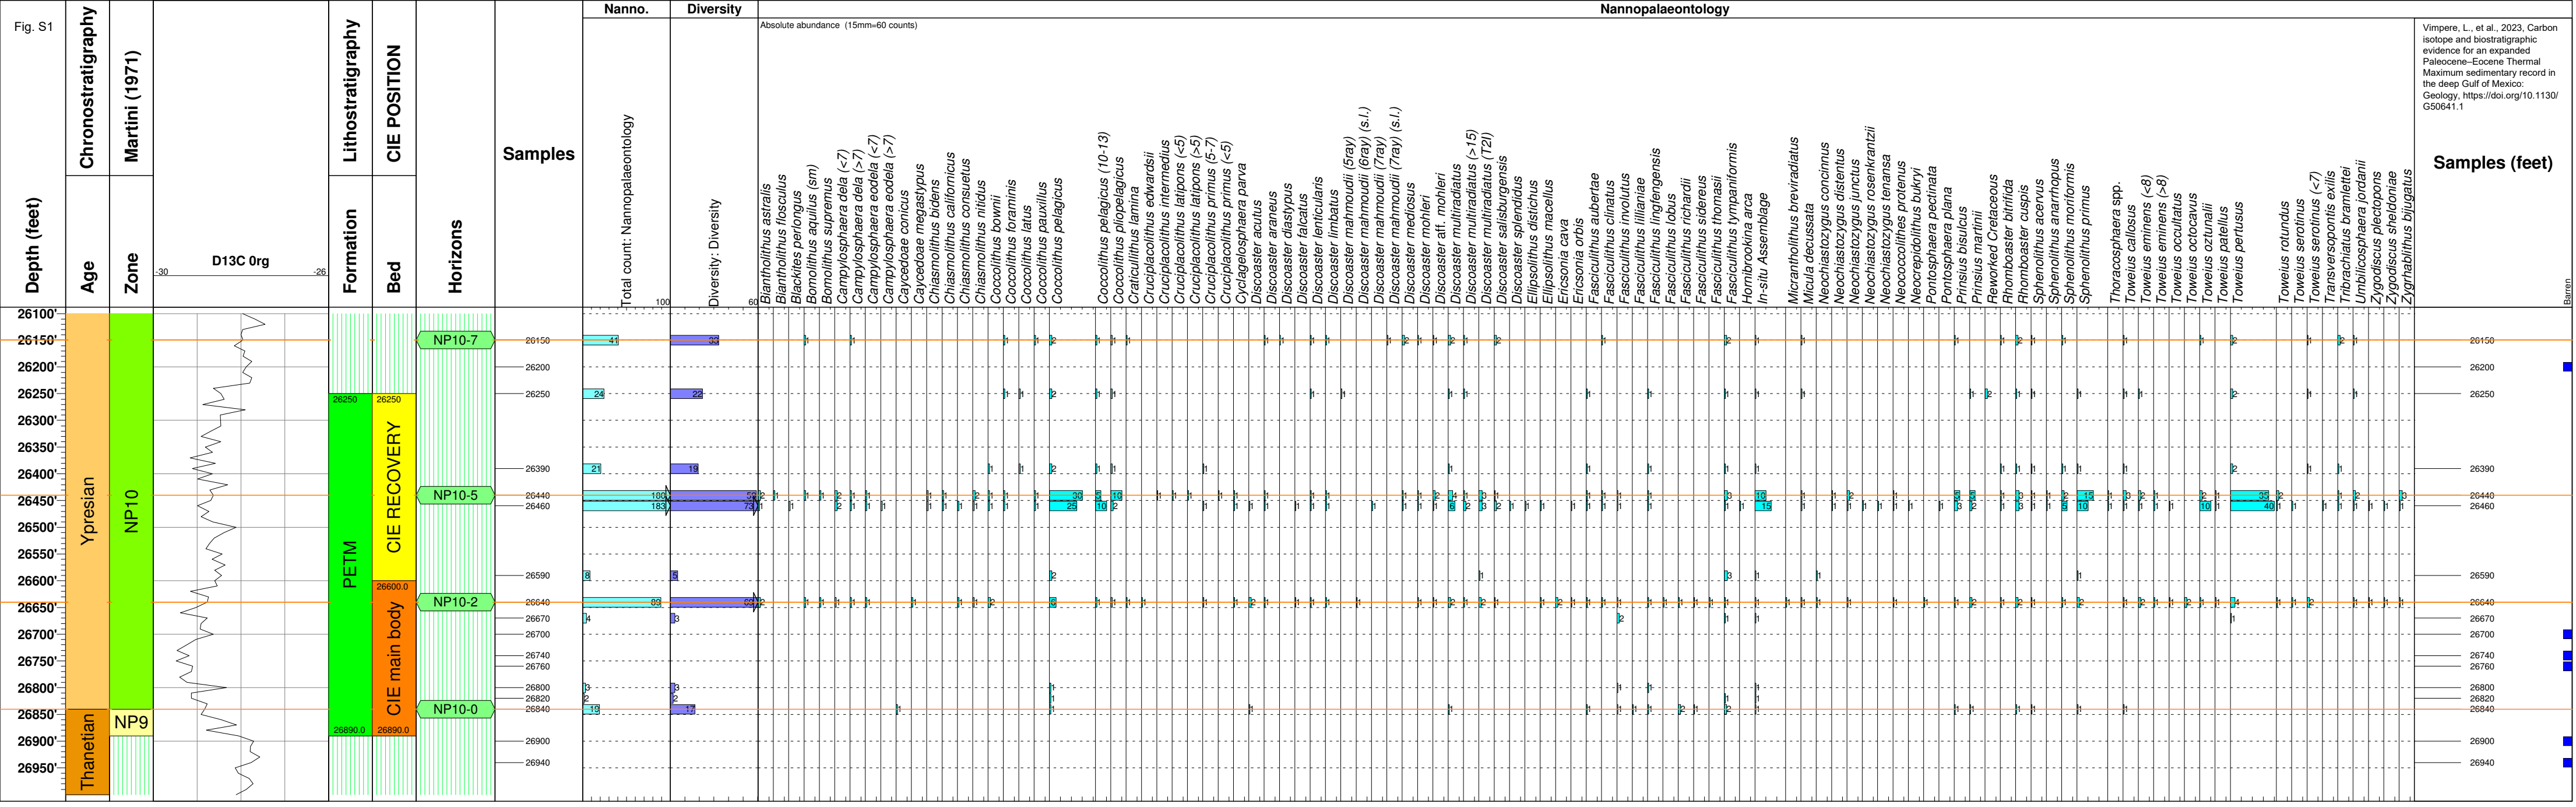

Supplement: Supplementary file 1 [file 1]

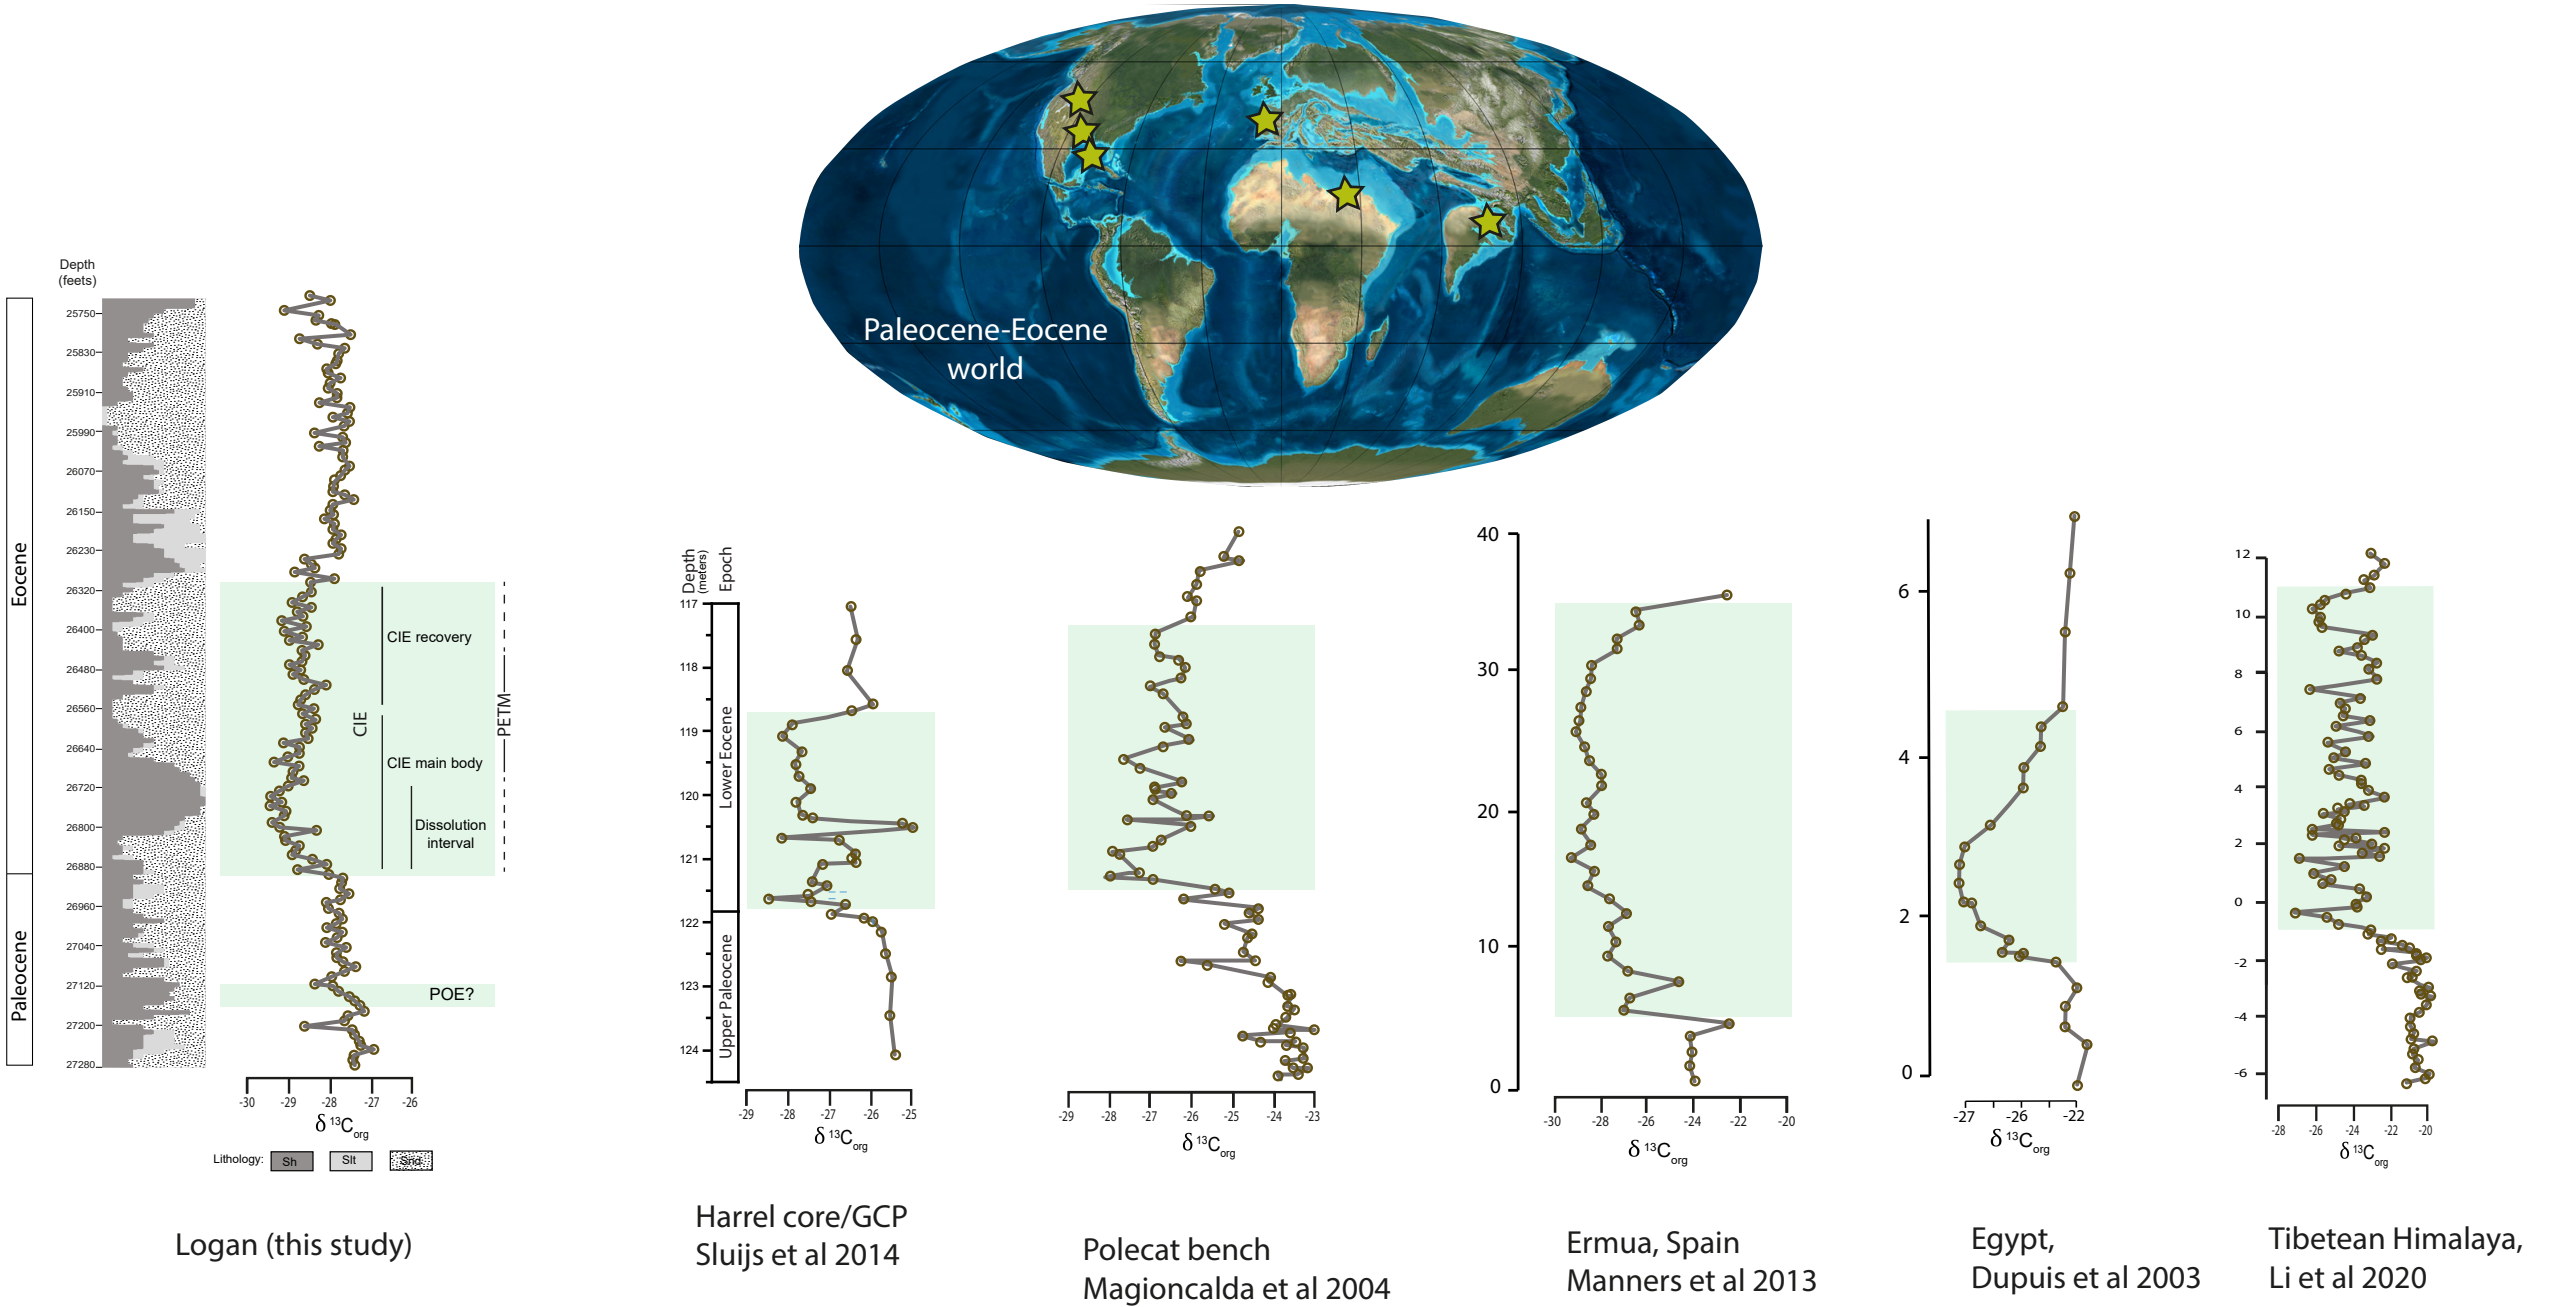

Fig. S2

Supplement: Supplementary file 2 [file 1]
